# Supplementary material for: Electron redistribution induced by p–d orbital hybridization in Co2P/FeP nanosheets boosts water electrooxidation
Source: Royal Society of Chemistry journal article supplement (doi:10.1039/d4ta05168h), 2024-01-01
Supplement: d4ta05168h1.pdf [file d4ta05168h1.pdf]

## **Electron redistribution induced by p–d orbital hybridization in Co<sub>2</sub>P/FeP nanosheets boosts water electrooxidation†**

Qiyang Sun<sup>a</sup>, Yu Miao<sup>a</sup>, Ruixue Zhang<sup>a</sup>, Guang-Rui Xu<sup>a,\*</sup>, Chuanfang Zhang<sup>c</sup>, Kang  
Liu<sup>b</sup>, Zexing Wu<sup>b</sup>, and Lei Wang<sup>a,b,\*</sup>

<sup>a</sup> Key Laboratory of Eco-chemical Engineering, Key Laboratory of Optic-electric Sensing and Analytical Chemistry of Life Science, Taishan Scholar Advantage and Characteristic Discipline Team of Eco Chemical Process and Technology, School of Materials Science and Engineering, Qingdao University of Science and Technology, Qingdao 266042, PR China

<sup>b</sup> College of Chemistry and Molecular Engineering, Qingdao University of Science and Technology, Qingdao 266042, PR China

<sup>c</sup> Shandong Weima Equipment Science & Technology Co., Ltd., Dongying, 257000, China

E-mail: xugrui@gmail.com (G.-R. Xu); inorchemwl@126.com (L. Wang)

## Computational Details

All DFT calculations were performed using the Vienna ab initio simulation package (VASP5.4.4).<sup>1</sup> The exchange-correlation is simulated with PBE functional and the ion-electron interactions were described by the PAW method.<sup>2,3</sup> The vdWs interaction was included by using empirical DFT-D3 method.<sup>4</sup> The Monkhorst-Pack-grid-mesh-based Brillouin zone k-points are set as 2×2×1 for all periodic structure with the cutoff energy of 400 eV. The convergence criteria are set as 0.02 eV Å<sup>-1</sup> and 10<sup>-5</sup> eV in force and energy, respectively.

The free energy calculation of species adsorption ( $\Delta G$ ) is based on Nørskov *et al*'s hydrogen electrode model.<sup>5</sup>

$$\Delta G = \Delta E + \Delta E_{\text{ZPE}} - T\Delta S + eG_{\text{U}} \quad (1)$$

Herein  $\Delta E$ ,  $\Delta E_{\text{ZPE}}$ , and  $\Delta S$  respectively represent the changes of electronic energy, zero-point energy, and entropy that caused by adsorption of intermediate, while the  $eG_{\text{U}}$  is free energy change contributed by the applied potential, 1.23 V in typical OER. The entropy of H<sup>+</sup>+e<sup>-</sup> pair is approximately regarded as half of H<sub>2</sub> entropy in standard condition.<sup>6</sup>

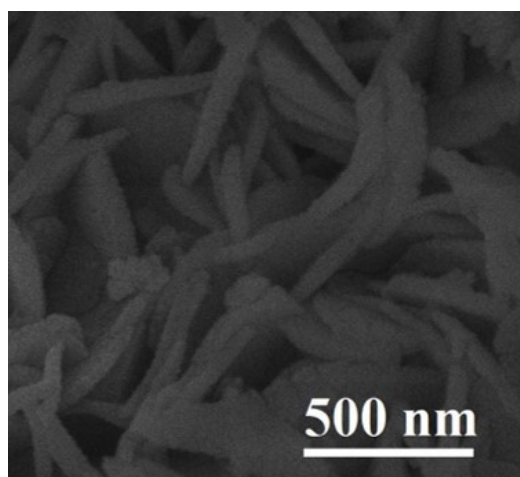

**Fig. S1** SEM image of FeP nanosheets.

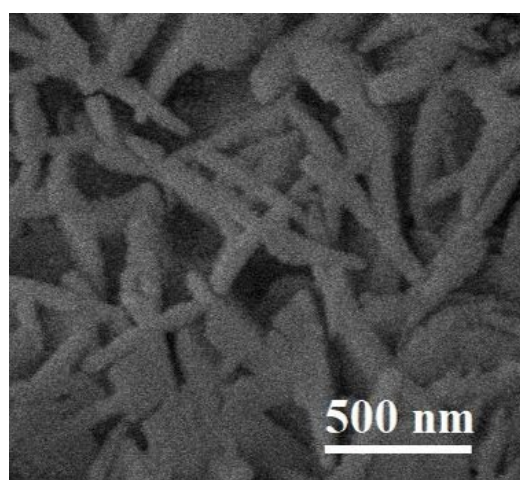

**Fig. S2** SEM image of Co<sub>2</sub>P nanosheets.

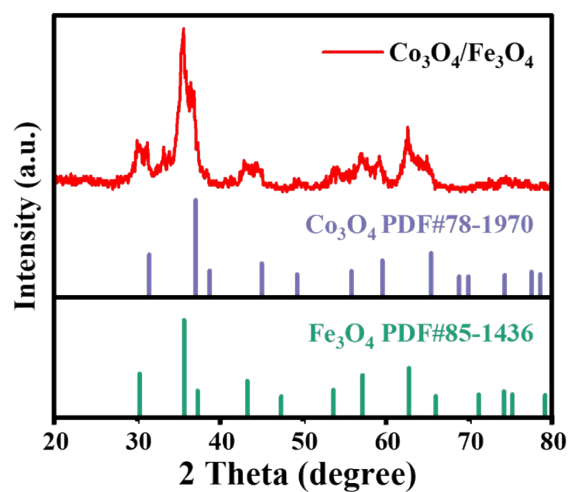

**Fig. S3** XRD patterns of the Co<sub>3</sub>O<sub>4</sub>/Fe<sub>3</sub>O<sub>4</sub> nanosheets.

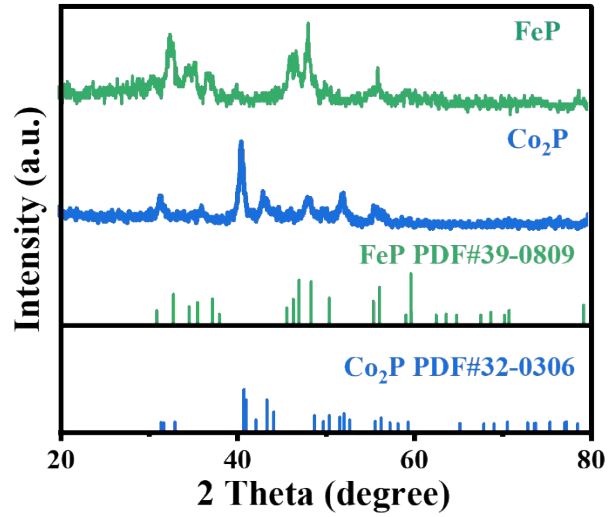

**Fig. S4** XRD patterns of the FeP and Co<sub>2</sub>P nanosheets.

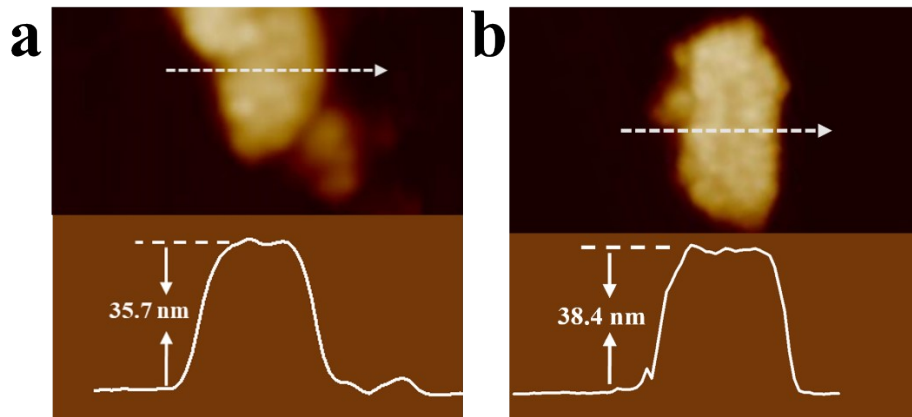

**Fig. S5** Co<sub>2</sub>P/FeP nanosheets of AFM image.

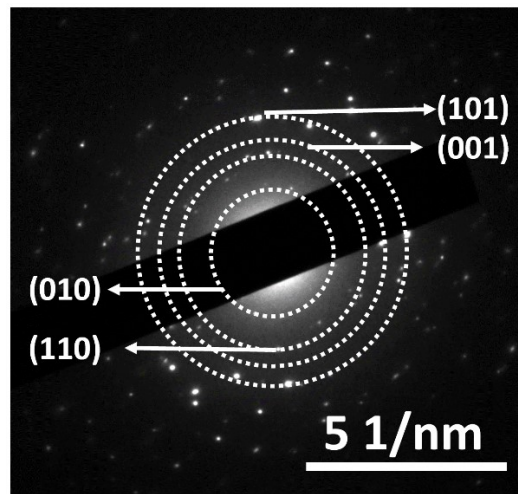

**Fig. S6** Co<sub>2</sub>P/FeP nanosheets of experimental SAED pattern.

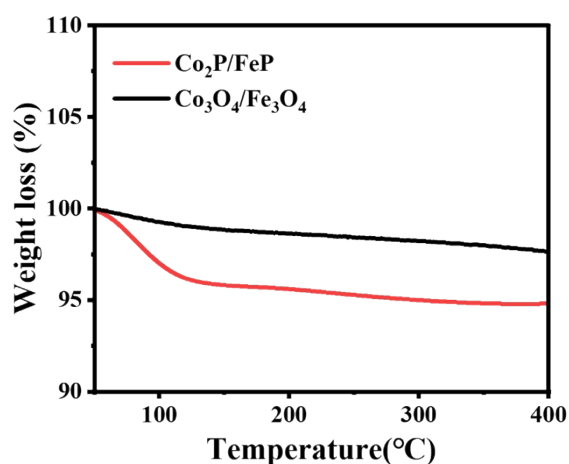

**Fig. S7** TGA curves of  $\text{Co}_2\text{P}/\text{FeP}$  nanosheets and their derived  $\text{Co}_3\text{O}_4/\text{Fe}_3\text{O}_4$  nanosheets.

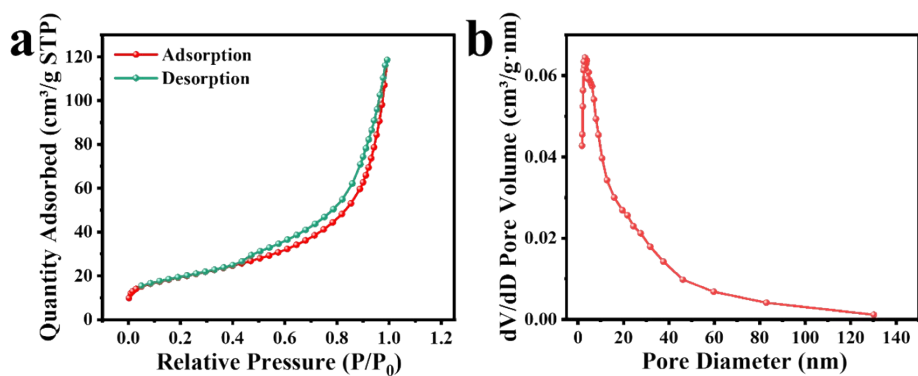

**Fig. S8** (a) Nitrogen adsorption-desorption isotherm, and (b) pore size distribution for  $\text{Co}_2\text{P}/\text{FeP}$  nanosheets.

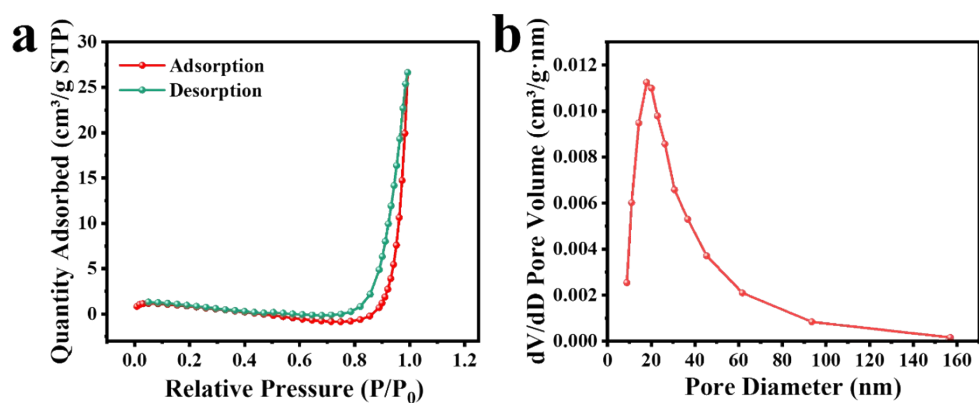

**Fig. S9** (a) nitrogen adsorption-desorption isotherm, and (b) pore size distribution for  $\text{Co}_3\text{O}_4/\text{Fe}_3\text{O}_4$  nanosheets.

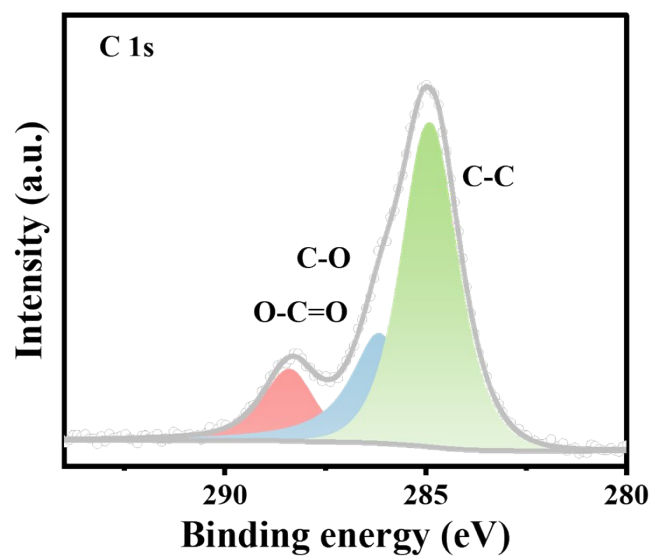

**Fig. S10** C 1s XPS spectrum of Co<sub>2</sub>P/FeP nanosheets.

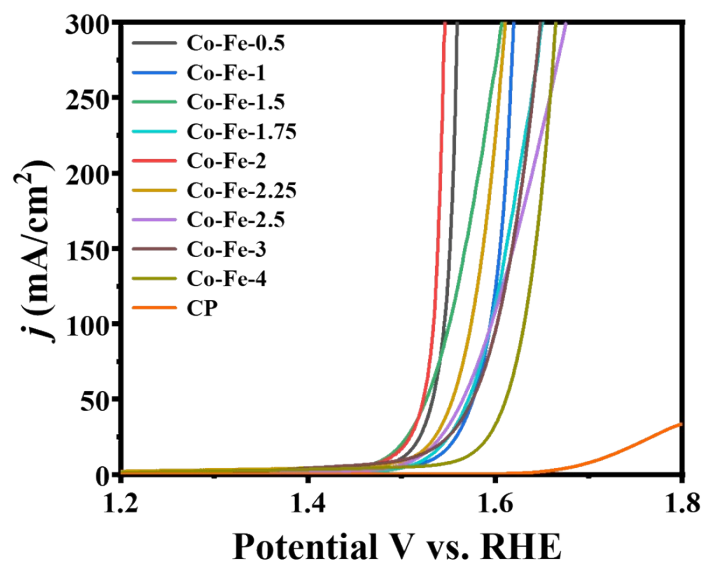

**Fig. S11** LSV curves of a series of Co<sub>2</sub>P/FeP nanosheets with different Co/Fe ratios measured in 1 M KOH.

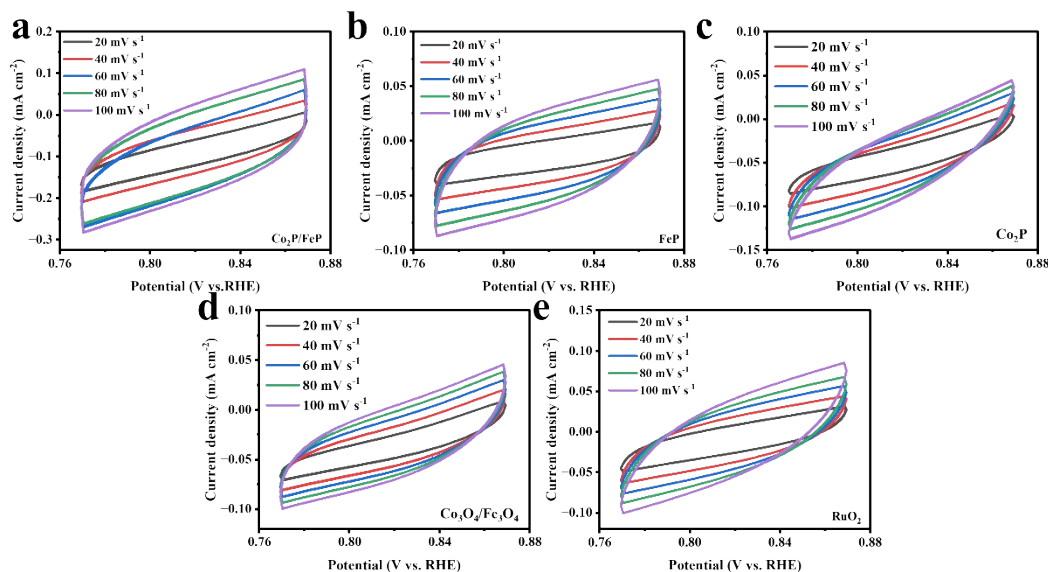

**Fig. S12** CV curves at different scan rates (20-100 mV s<sup>-1</sup> with the interval of 20 mV s<sup>-1</sup>) of (a) Co<sub>2</sub>P/FeP nanosheets. (b) FeP nanosheets. (c) Co<sub>2</sub>P nanosheets. (d) Co<sub>3</sub>O<sub>4</sub>/Fe<sub>3</sub>O<sub>4</sub> nanosheets and (e) commercial RuO<sub>2</sub> catalysts during OER process under 1 M KOH solution.

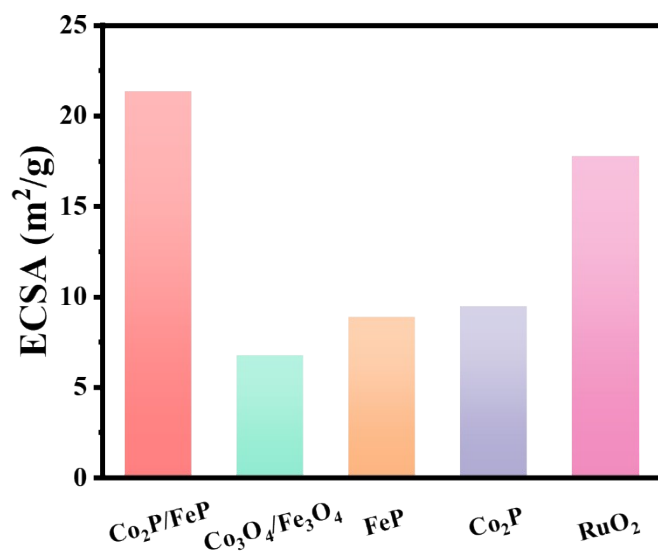

**Fig. S13** ECSA of (a) Co<sub>2</sub>P/FeP nanosheets, (b) FeP nanosheets, (c) Co<sub>2</sub>P nanosheets, (d) Co<sub>3</sub>O<sub>4</sub>/Fe<sub>3</sub>O<sub>4</sub> nanosheets, and (e) commercial RuO<sub>2</sub> catalysts during OER process under 1 M KOH solution.

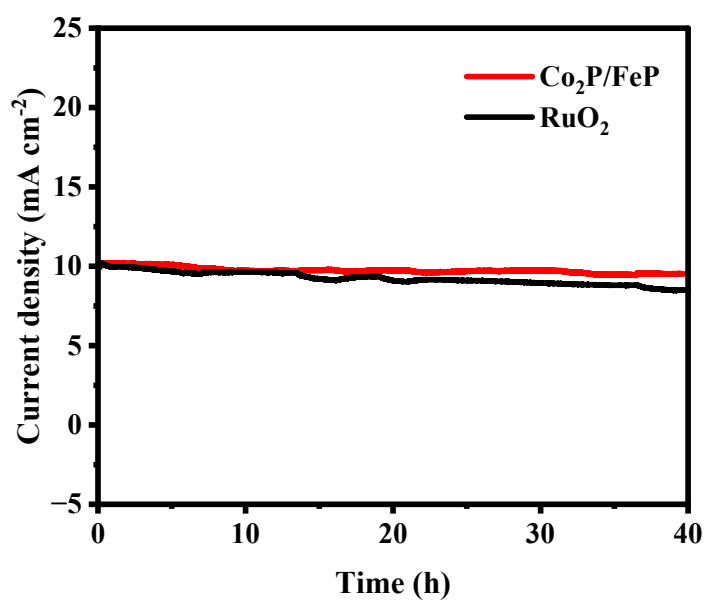

**Fig. S14** The long-term durability test of Co<sub>2</sub>P/FeP nanosheets and commercial RuO<sub>2</sub> at 10 mA cm<sup>-2</sup> in 1 M KOH solution.

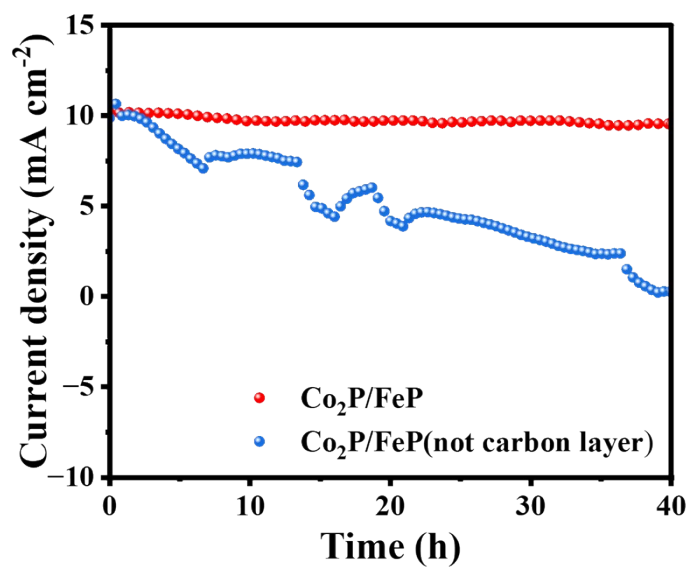

**Fig. S15** Chronoamperometric curve for Co<sub>2</sub>P/FeP nanosheets and Co<sub>2</sub>P/FeP without carbon layer.



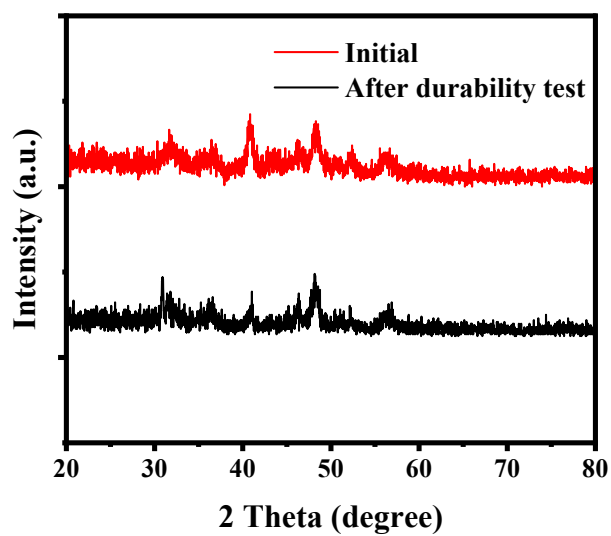

**Fig. S16** XRD patterns of the Co<sub>2</sub>P/FeP nanosheets after the long-term durability test.

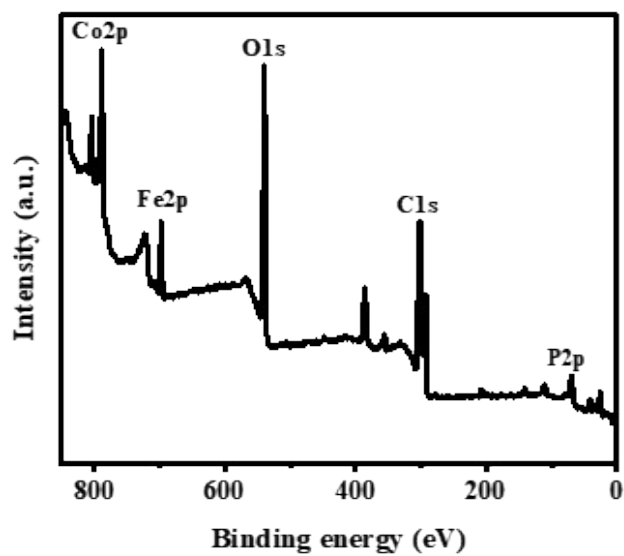

**Fig. S17** The full XPS spectrum of Co<sub>2</sub>P/FeP nanosheets after the long-term durability test.

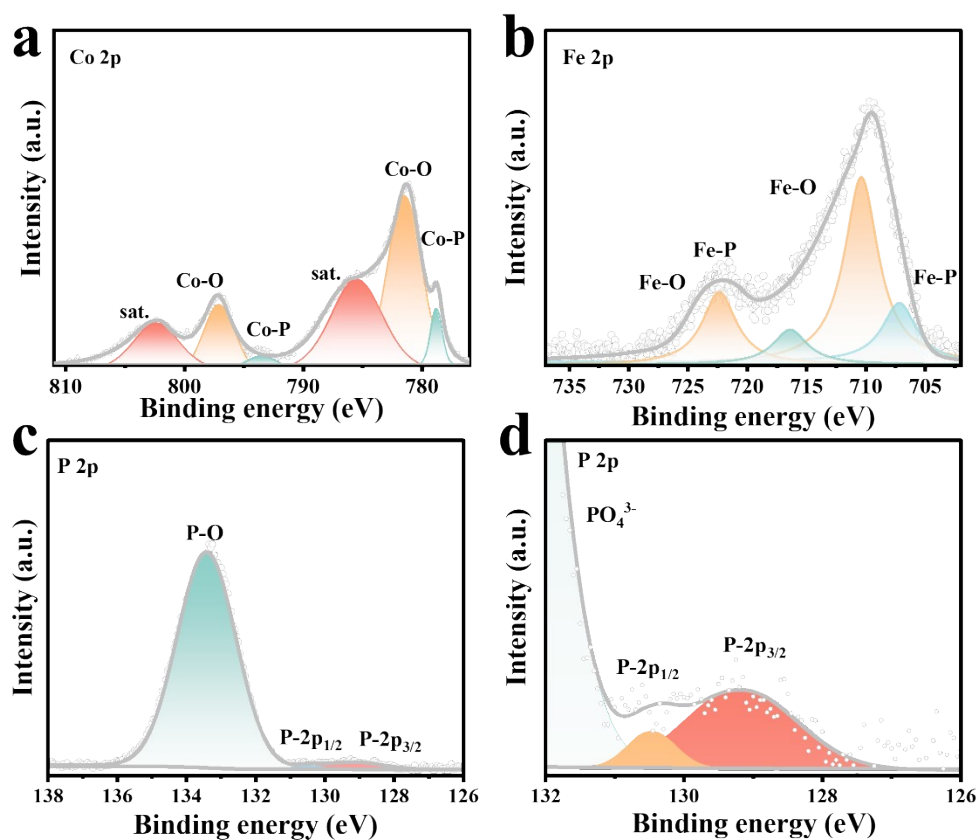

**Fig. S18** XPS spectra of (a) Fe 2p, (b) Co 2p, and (c, d) P 2p for  $\text{Co}_2\text{P}/\text{FeP}$  nanosheets after the long-term durability test.

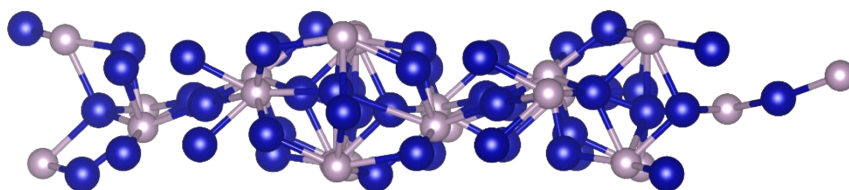

**Fig. S19** Structure model of  $\text{Co}_2\text{P}$  nanosheets.

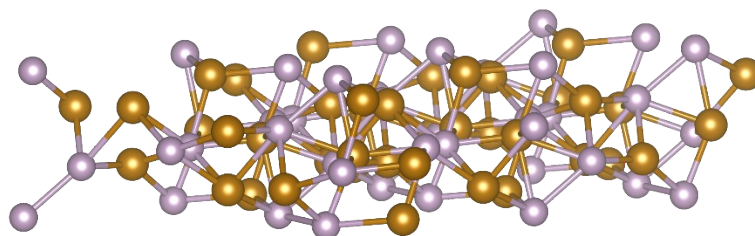

**Fig. S20** Structure model of  $\text{FeP}$  nanosheets.

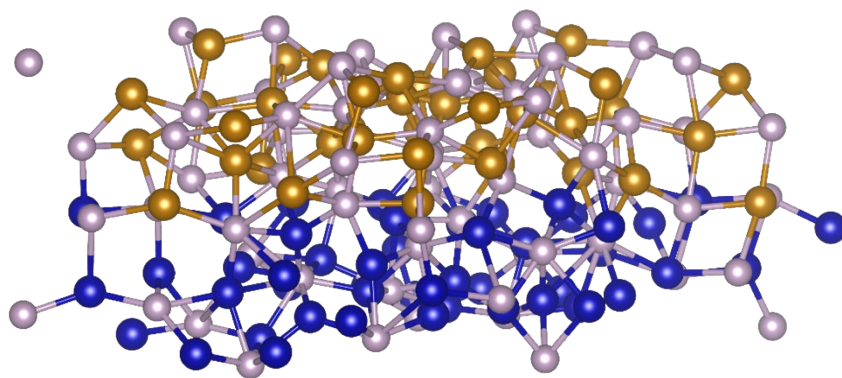

**Fig. S21** Structure model of Co<sub>2</sub>P/FeP nanosheets.

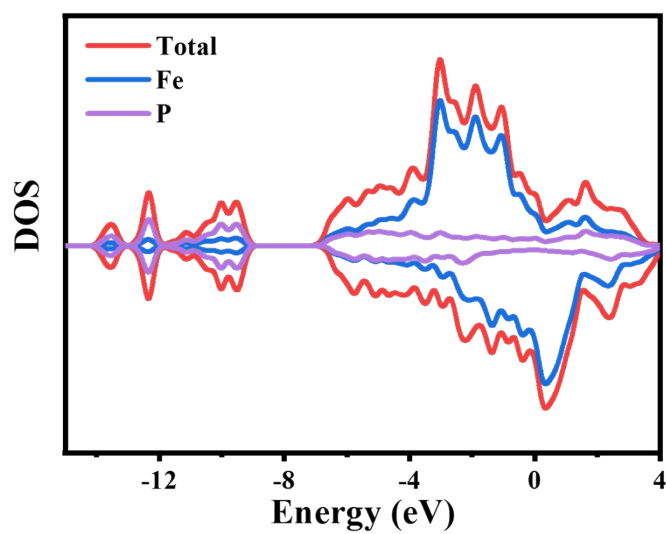

**Fig. S22** Calculated DOS profiles of FeP nanosheets.

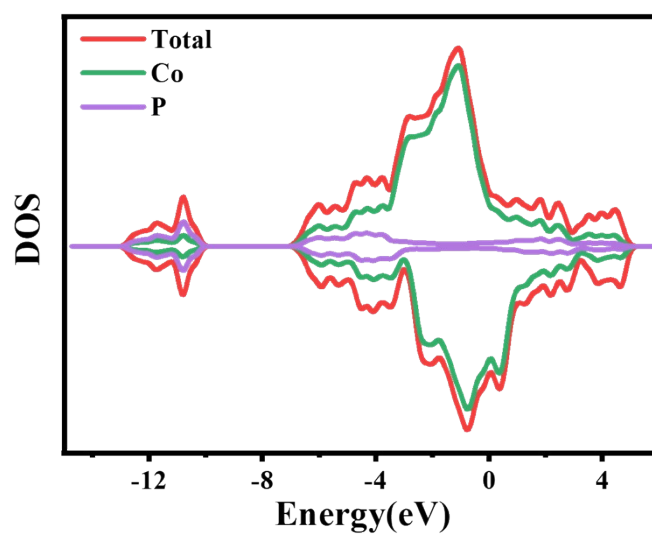

**Fig. S23** Calculated DOS profiles of Co<sub>2</sub>P nanosheets.

**Table S1** A series of Co<sub>2</sub>P/FeP nanosheets with varying Co/Fe synthetic parameter ratios and their corresponding properties.

| <b>Entry</b> | <b>Samples</b> | <b>n (Co source) (g)</b> | <b>n (Fe source) (g)</b> | <b><math>\eta_{10}</math> for OER (mV)</b> | <b><math>\eta_{100}</math> for OER (mV)</b> |
|--------------|----------------|--------------------------|--------------------------|--------------------------------------------|---------------------------------------------|
| <b>1</b>     | Co-Fe-0.5      | 0.415                    | 0.636                    | 267                                        | 313                                         |
| <b>2</b>     | Co-Fe-1        | 0.623                    | 0.477                    | 303                                        | 364                                         |
| <b>3</b>     | Co-Fe-1.5      | 0.747                    | 0.382                    | 251                                        | 322                                         |
| <b>4</b>     | Co-Fe-1.75     | 0.913                    | 0.255                    | 294                                        | 364                                         |
| <b>5</b>     | Co-Fe-2        | 0.830                    | 0.318                    | 257                                        | 304                                         |
| <b>6</b>     | Co-Fe-2.25     | 0.862                    | 0.294                    | 276                                        | 344                                         |
| <b>7</b>     | Co-Fe-2.5      | 0.890                    | 0.273                    | 284                                        | 365                                         |
| <b>8</b>     | Co-Fe-3        | 0.934                    | 0.239                    | 274                                        | 372                                         |
| <b>9</b>     | Co-Fe-4        | 0.996                    | 0.191                    | 333                                        | 401                                         |
| <b>10</b>    | CP             | /                        | /                        | 480                                        | /                                           |

**Table S2** The OER performances of nonnoble-based electrocatalysts that reported recently.

|                                                       | <b>Overpotential (mV)</b> | <b>Tafel (mV dec<sup>-1</sup>)</b> | <b>Current density (mA cm<sup>-2</sup>)</b> | <b>Res.</b> |
|-------------------------------------------------------|---------------------------|------------------------------------|---------------------------------------------|-------------|
| Co <sub>2</sub> P/FeP                                 | 257                       | 39.6                               | 10                                          | This work   |
| FeP                                                   | 416                       | 73.2                               | 10                                          | This work   |
| Co <sub>2</sub> P                                     | 400                       | 68.2                               | 10                                          | This work   |
| CoFe <sub>2</sub> O <sub>4</sub>                      | 309                       | 67.4                               | 10                                          | 8           |
| Co <sub>3</sub> O <sub>4</sub>                        | 278                       | 41                                 | 10                                          | 9           |
| Co <sub>3-x</sub> Pd <sub>x</sub> O <sub>4</sub>      | 370                       | 60                                 | 10                                          | 10          |
| FeP <sub>4</sub> /CoP/C                               | 258                       | 41                                 | 10                                          | 11          |
| Fe-Ni-Pi-5-SHP                                        | 263                       | 44                                 | 10                                          | 12          |
| Co <sub>3</sub> Cu-Ni <sub>2</sub> MNs                | 288                       | 87                                 | 10                                          | 13          |
| Ni <sub>3</sub> N@2M-MoS <sub>2</sub>                 | 327                       | 38.9                               | 10                                          | 14          |
| MoS <sub>2</sub> /NiS <sub>2</sub>                    | 381                       | 92                                 | 10                                          | 15          |
| FeP                                                   | 470                       | 137                                | 10                                          | 16          |
| CoP                                                   | 340                       | 114                                | 10                                          | 16          |
| Fe <sub>2</sub> P/NiCoP                               | 272                       | 92.1                               | 10                                          | 17          |
| Fe <sub>2</sub> P@FeN <sub>3</sub> P <sub>1</sub> -NC | 320                       | 46.4                               | 10                                          | 18          |
| FeP/CoP                                               | 266                       | 60.86                              | 10                                          | 19          |
| Fe <sub>2</sub> O <sub>3</sub> /FeP                   | 264                       | 47                                 | 10                                          | 20          |
| FeP@Au                                                | 320                       | 56.8                               | 10                                          | 21          |
| CoP                                                   | 345                       | 47                                 | 10                                          | 21          |
| Ni-P                                                  | 344                       | 49                                 | 10                                          | 21          |
| CoNiFeP@C NPs                                         | 260                       | 65.5                               | 10                                          | 22          |
| NiFeP/CoP                                             | 274                       | 70                                 | 10                                          | 23          |

**Table S3** D-band center of Co<sub>2</sub>P, FeP, and Co<sub>2</sub>P/FeP

|                    | <b>Co<sub>2</sub>P</b> | <b>FeP</b> | <b>Co<sub>2</sub>P/FeP</b> |
|--------------------|------------------------|------------|----------------------------|
| d-band-center-up   | -1.67                  | -2.072     | -1.532                     |
| d-band-center-down | -0.924                 | -0.484     | -0.958                     |
| d-band-center      | -1.297                 | -1.278     | -1.245                     |

## References

- 1 G. Kresse and J. Furthmüller, *Phys. Rev. B*, 1996, **54**, 11169–11186.
- 2 J. P. Perdew, K. Burke and M. Ernzerhof, *Phys Rev Lett.*, 1996, **77**, 3865.
- 3 B. Hammer, L. B. Hansen and J. K. Nørskov, *Phys. Rev. B*, 1999, **59**, 7413–7421.
- 4 S. Grimme, *J. Comput. Chem.*, 2006, **27**, 1787–1799.
- 5 E. Skúlason, V. Tripkovic, M. E. Björketun, S. Gudmundsdóttir, G. Karlberg, J. Rossmeisl, T. Bligaard, H. Jónsson and J. K. Nørskov, *J. Phys. Chem. C*, 2010, **114**, 18182–18197.
- 6 G. Gao, A. P. O’Mullane and A. Du, *ACS Catal.*, 2017, **7**, 494–500.
- 7 S. L. Zhang, B. Y. Guan, X. F. Lu, S. Xi, Y. Du and X. W. (David) Lou, *Adv. Mater.*, 2020, **32**, 2002235.
- 8 Y. Wang, J. Jia, X. Zhao, W. Hu, H. Li, X. Bai, J. Huang, J. Zhang, J. Li, X. Tang, Y. Peng, J. Huang and C. Xu, *ACS Catal.*, 2024, **14**, 2313–2323.
- 9 N. Wang, P. Ou, R. K. Miao, Y. Chang, Z. Wang, S.-F. Hung, J. Abed, A. Ozden, H.-Y. Chen, H.-L. Wu, J. E. Huang, D. Zhou, W. Ni, L. Fan, Y. Yan, T. Peng, D. Sinton, Y. Liu, H. Liang and E. H. Sargent, *J. Am. Chem. Soc.*, 2023, **145**, 7829–7836.
- 10 N. Wang, P. Ou, S. Hung, J. E. Huang, A. Ozden, J. Abed, I. Grigioni, C. Chen, R. K. Miao, Y. Yan, J. Zhang, Z. Wang, R. Dorakhan, A. Badreldin, A. Abdel-Wahab, D. Sinton, Y. Liu, H. Liang and E. H. Sargent, *Adv. Mater.*, 2023, **35**, 2210057.
- 11 P. Zhao, C. Peng, Y. Luo, L. Cheng, Z. Li and Z. Jiao, *Chem. Eng. J.*, 2024, **483**, 149121.
- 12 C. Xuan, T. Shen and B. Hou, *Chem. Eng. J.*, 2024, **479**, 147723.
- 13 P. Dong, Y. Gu, G. Wen, R. Luo, S. Bao, J. Ma and J. Lei, *Small*, 2023, **19**, 2301473.
- 14 T. Wu, E. Song, S. Zhang, M. Luo, C. Zhao, W. Zhao, J. Liu and F. Huang, *Adv. Mater.*, 2022, **34**, 2108505.
- 15 Z. Yin, X. Liu, S. Chen, H. Xie, L. Gao, A. Liu, T. Ma and Y. Li, *Mater. Today Nano*, 2022, **17**, 100156.
- 16 S. Hou, A. Zhang, Q. Zhou, Y. Wen, S. Zhang, L. Su, X. Huang, T. Wang, K. Rui, C. Wang, H. Liu, Z. Lu and P. He, *Nano Res.*, 2023, **16**, 6601–6607.
- 17 L. Jin, H. Xu, K. Wang, L. Yang, Y. Liu, X. Qian, G. He and H. Chen, *Appl. Surf. Sci.*, 2024, **657**, 159777.
- 18 E. Zhu, C. Shi, J. Yu, H. Jin, L. Zhou, X. Yang and M. Xu, *Appl. Catal. B Environ. Energy*, 2024, **347**, 123796.
- 19 X. Lei, J. Qing, L. Weng, S. Li, R. Peng, W. Wang and J. Wang, *New J. Chem.*, 2022, **46**, 15351–15357.
- 20 I. Ahmad, J. Ahmed, S. Batool, M. N. Zafar, A. Hanif, Zahidullah, M. F. Nazar, A. Ul-Hamid, U. Jabeen, A. Dahshan, M. Idrees and S. A. Shehzadi, *J. Alloys Compd.*, 2022, **894**, 162409.
- 21 J. Masud, S. Umapathi, N. Ashokaan and M. Nath, *J. Mater. Chem. A*, 2016, **4**, 9750–9754.
- 22 C. Zhang, Z. Xing, Y. Peng, H. Zhou, L. Zhang and Z.-H. Lu, *Fuel*, 2024, **365**,

131181.

23 G.-L. Li, Y.-Y. Miao, F. Deng, S. Wang, R.-X. Wang, W.-H. Lu and R.-L. Chen, *J. Colloid Interface Sci.*, 2024, **667**, 543–552.
